# Supplementary material for: The impact of stopping and starting indoor residual spraying on malaria burden in Uganda
Source: PubMed Central journal article supplement (PMC8113470; doi:10.1038/s41467-021-22896-5), 2021-05-11
Supplement: 41467_2021_22896_MOESM1_ESM.pdf [file 41467_2021_22896_MOESM1_ESM.pdf]

Supplementary Fig 1. Timeline indicating the dates of vector control campaigns, baseline and evaluation periods for the 14 study sites.

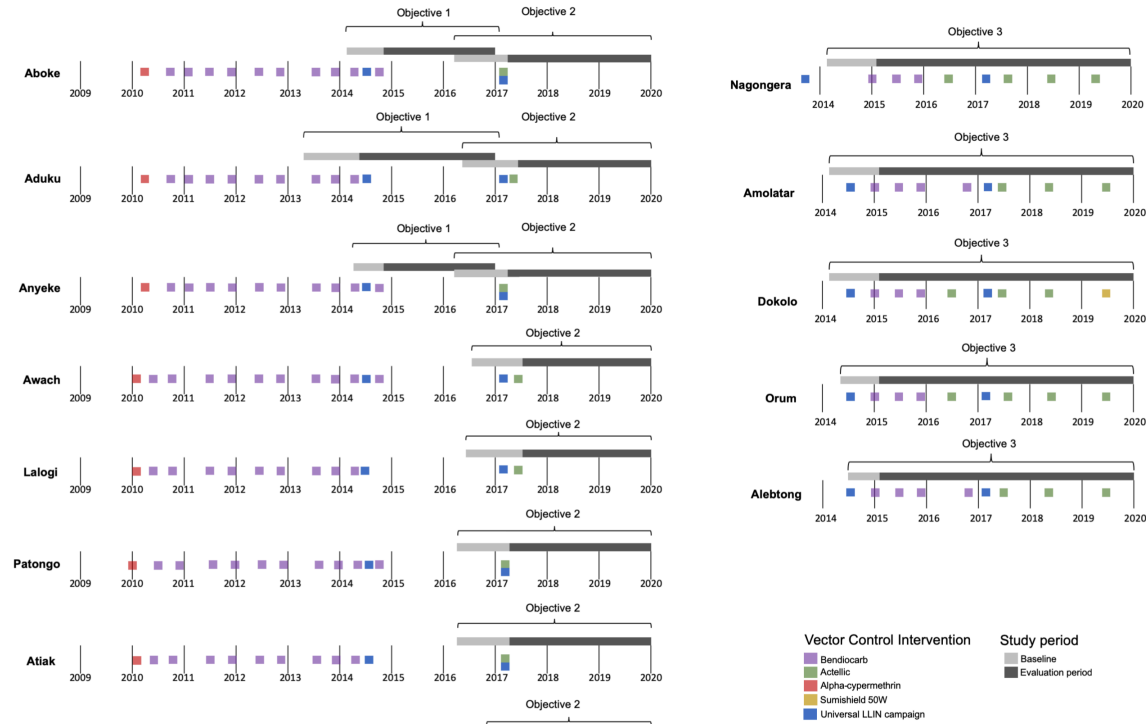

Supplementary Fig 2. Case counts over time for the three study sites included in the analysis for study objective 1.

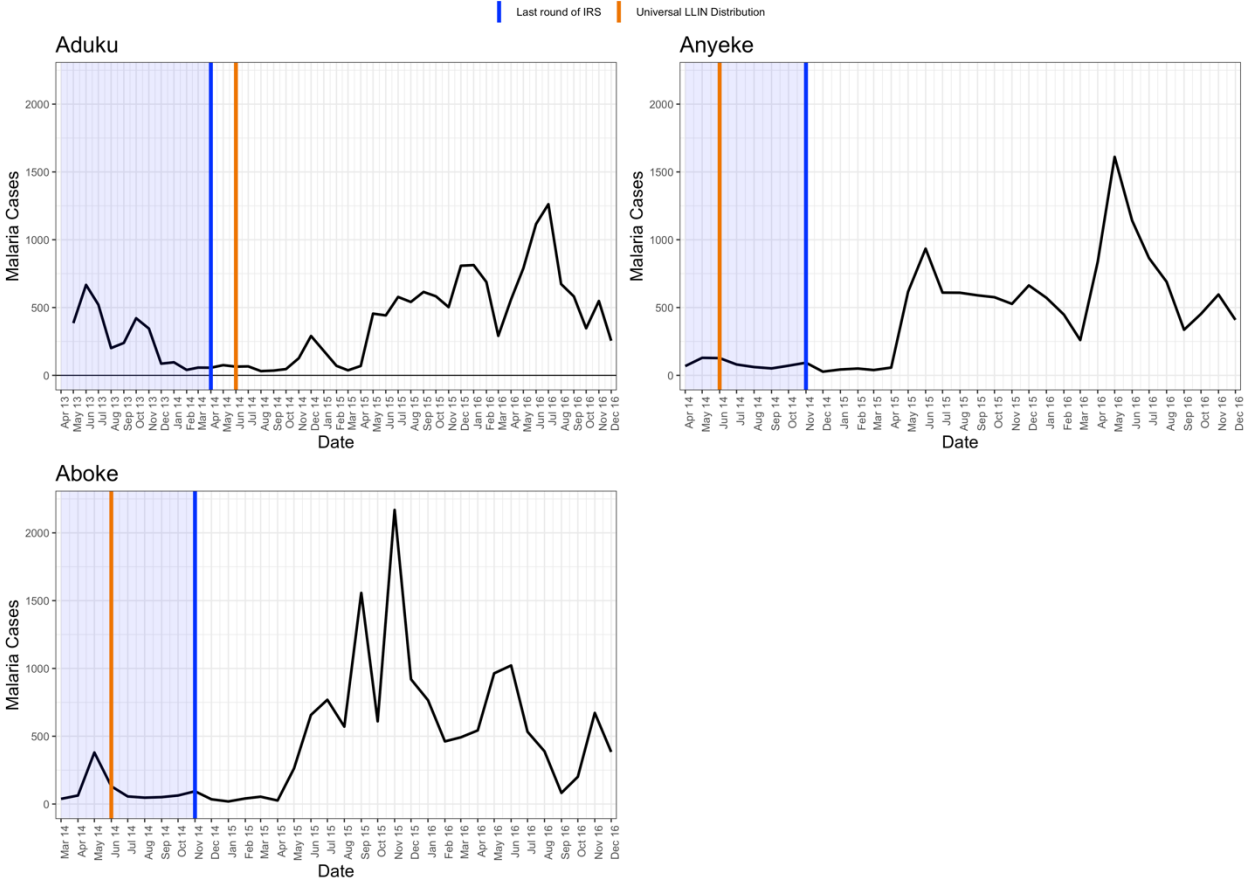

Supplementary Table 1. Coefficients and 95% confidence intervals for study objective 1. P-values are 2-sided and correspond to t-test from regression models. No adjustment for multiple comparisons was made.

| <i>Variable</i>                                          | <b>OR</b> | <b>pvalue</b> | <b>LL</b> | <b>UL</b> |
|----------------------------------------------------------|-----------|---------------|-----------|-----------|
| <i>Months since IRS stopped</i>                          |           |               |           |           |
| 0                                                        | REF       | 0.001         | 0.094     | 0.527     |
| 1                                                        | 0.223     | 0.002         | 0.117     | 0.604     |
| 2                                                        | 0.266     | 0.242         | 0.240     | 1.434     |
| 3                                                        | 0.587     | 0.244         | 0.272     | 1.392     |
| 4                                                        | 0.615     | 0.048         | 0.218     | 0.992     |
| 5                                                        | 0.465     | 0.445         | 0.642     | 2.746     |
| 6                                                        | 1.327     | 0.098         | 0.880     | 4.586     |
| 7                                                        | 2.009     | 0.040         | 1.040     | 5.091     |
| 8                                                        | 2.301     | 0.000         | 2.483     | 11.925    |
| 9                                                        | 5.442     | 0.000         | 3.790     | 20.128    |
| 10                                                       | 8.734     | 0.000         | 2.166     | 10.122    |
| 11                                                       | 4.683     | 0.000         | 2.925     | 13.170    |
| 12                                                       | 6.207     | 0.001         | 1.921     | 10.702    |
| 13                                                       | 4.535     | 0.000         | 1.952     | 10.785    |
| 14                                                       | 4.588     | 0.000         | 3.116     | 17.264    |
| 15                                                       | 7.334     | 0.000         | 3.687     | 17.487    |
| 16                                                       | 8.030     | 0.000         | 3.624     | 16.648    |
| 17                                                       | 7.767     | 0.000         | 3.129     | 13.562    |
| 18                                                       | 6.514     | 0.000         | 2.411     | 11.714    |
| 19                                                       | 5.314     | 0.000         | 2.158     | 10.762    |
| 20                                                       | 4.819     | 0.000         | 3.833     | 18.727    |
| 21                                                       | 8.472     | 0.000         | 1.946     | 8.524     |
| 22                                                       | 4.073     | 0.000         | 2.327     | 10.088    |
| 23                                                       | 4.845     | 0.000         | 2.234     | 9.625     |
| 24                                                       | 4.637     | 0.001         | 1.710     | 8.683     |
| 25                                                       | 3.853     | 0.001         | 2.358     | 23.600    |
| 26                                                       | 7.459     | 0.000         | 2.487     | 23.305    |
| 27                                                       | 7.613     | 0.001         | 2.080     | 19.145    |
| 28                                                       | 6.310     | 0.024         | 1.191     | 11.658    |
| 29                                                       | 3.726     | 0.025         | 1.184     | 12.104    |
| 30                                                       | 3.785     | 0.122         | 0.775     | 8.799     |
| 31                                                       | 2.611     | 0.516         | 0.956     | 1.023     |
| <i>Precipitation (1 month lag)</i>                       | 0.989     | 0.516         | 0.956     | 1.023     |
| <i>Proportion of tests RDT</i>                           | 0.915     | 0.645         | 0.627     | 1.336     |
| <i>Count of patients not suspected of having malaria</i> | 1.000     | 0.026         | 1.000     | 1.001     |
| <i>Calendar month</i>                                    |           |               |           |           |
| <i>January</i>                                           | REF       |               |           |           |
| <i>February</i>                                          | 0.437     | 0.103         | 0.161     | 1.184     |
| <i>March</i>                                             | 0.363     | 0.032         | 0.144     | 0.917     |
| <i>April</i>                                             | 0.528     | 0.169         | 0.213     | 1.312     |
| <i>May</i>                                               | 1.640     | 0.237         | 0.722     | 3.724     |
| <i>June</i>                                              | 1.846     | 0.171         | 0.767     | 4.443     |
| <i>July</i>                                              | 1.277     | 0.431         | 0.695     | 2.344     |
| <i>August</i>                                            | 0.604     | 0.280         | 0.242     | 1.509     |
| <i>September</i>                                         | 0.638     | 0.324         | 0.261     | 1.558     |
| <i>October</i>                                           | 1.035     | 0.935         | 0.450     | 2.378     |
| <i>November</i>                                          | 1.223     | 0.649         | 0.514     | 2.913     |
| <i>December</i>                                          | 1.126     | 0.809         | 0.430     | 2.947     |
| <i>Constant</i>                                          | 126.954   | 0.000         | 54.478    | 295.851   |

Supplementary Fig 3. Adjust IRR (the measure of center for the error bars) and 95% confidence intervals (the error bars) for study objective 1 with raw laboratory-confirmed case counts as model outcome.

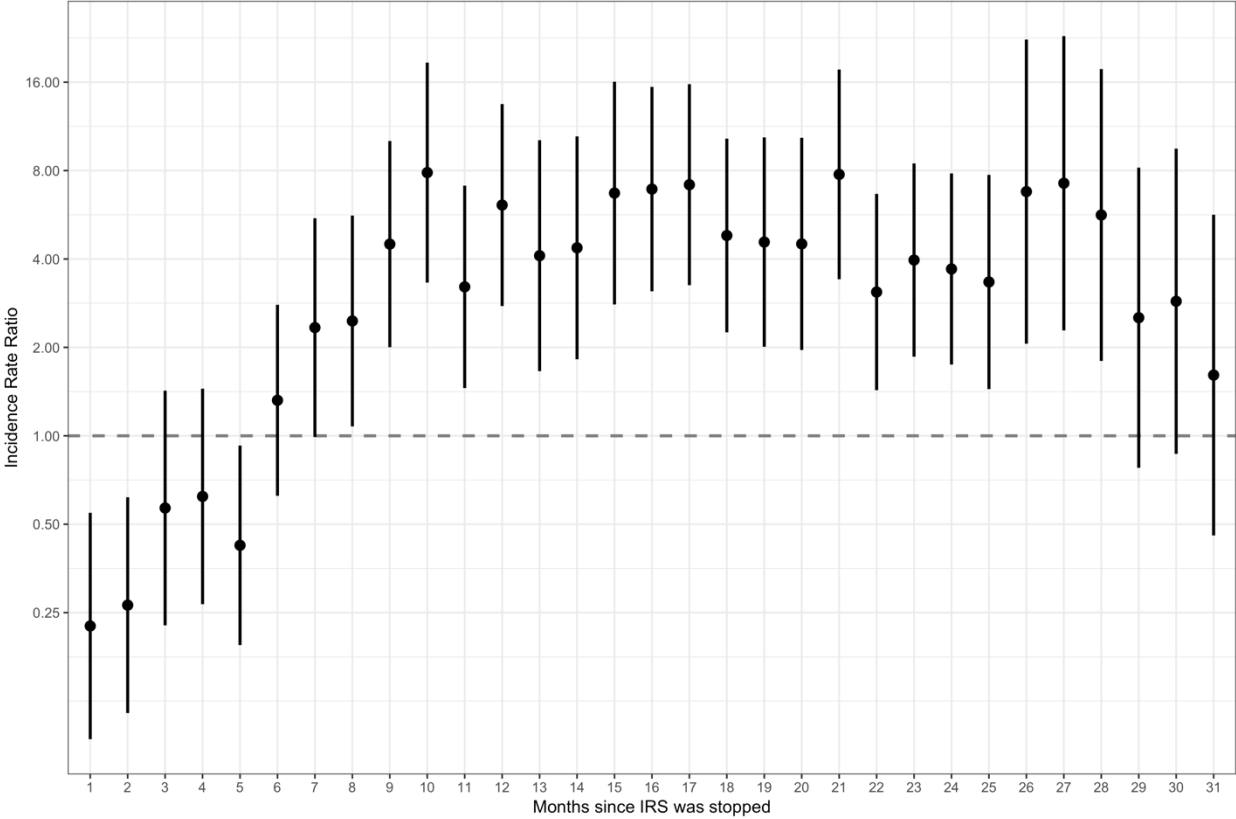

Supplementary Fig 4. Case counts over time for the nine study sites included in the analysis for study objective 2.

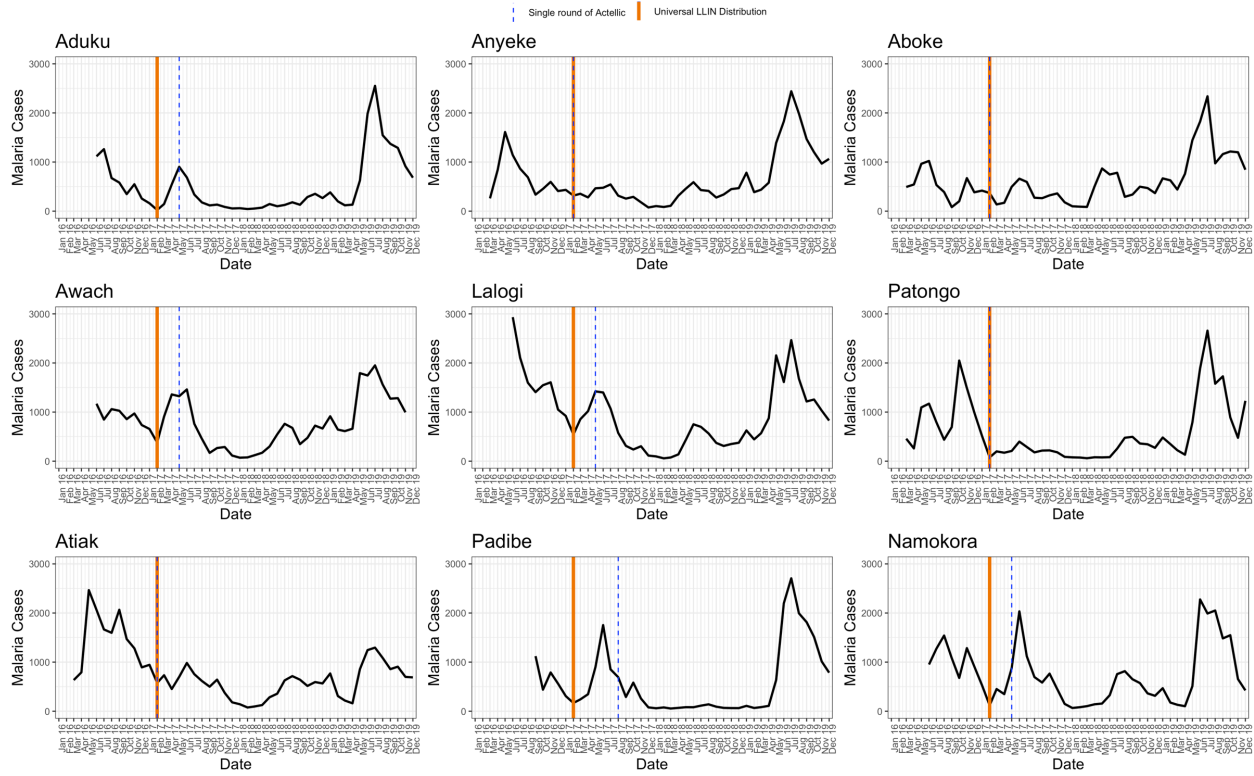

Supplementary Table 2. Coefficients and 95% confidence intervals for study objective 2. P-values are 2-sided and correspond to t-test from regression models. No adjustment for multiple comparisons was made.

| <i>Variable</i>                                          | <b>OR</b> | <b>pvalue</b> | <b>LL</b> | <b>UL</b> |
|----------------------------------------------------------|-----------|---------------|-----------|-----------|
| <i>Months since single round of IRS</i>                  |           |               |           |           |
| 0                                                        | REF       |               |           |           |
| 1                                                        | 0.706     | 0.033         | 0.513     | 0.973     |
| 2                                                        | 0.529     | 0.000         | 0.385     | 0.727     |
| 3                                                        | 0.373     | 0.000         | 0.272     | 0.511     |
| 4                                                        | 0.262     | 0.000         | 0.190     | 0.361     |
| 5                                                        | 0.293     | 0.000         | 0.212     | 0.405     |
| 6                                                        | 0.274     | 0.000         | 0.198     | 0.378     |
| 7                                                        | 0.208     | 0.000         | 0.151     | 0.286     |
| 8                                                        | 0.203     | 0.000         | 0.147     | 0.281     |
| 9                                                        | 0.194     | 0.000         | 0.140     | 0.268     |
| 10                                                       | 0.163     | 0.000         | 0.118     | 0.225     |
| 11                                                       | 0.180     | 0.000         | 0.130     | 0.249     |
| 12                                                       | 0.205     | 0.000         | 0.148     | 0.283     |
| 13                                                       | 0.188     | 0.000         | 0.136     | 0.260     |
| 14                                                       | 0.339     | 0.000         | 0.245     | 0.469     |
| 15                                                       | 0.351     | 0.000         | 0.254     | 0.486     |
| 16                                                       | 0.265     | 0.000         | 0.191     | 0.369     |
| 17                                                       | 0.315     | 0.000         | 0.227     | 0.438     |
| 18                                                       | 0.412     | 0.000         | 0.298     | 0.570     |
| 19                                                       | 0.455     | 0.000         | 0.330     | 0.627     |
| 20                                                       | 0.595     | 0.002         | 0.429     | 0.826     |
| 21                                                       | 0.703     | 0.033         | 0.509     | 0.971     |
| 22                                                       | 0.750     | 0.072         | 0.549     | 1.026     |
| 23                                                       | 1.090     | 0.593         | 0.795     | 1.493     |
| 24                                                       | 1.162     | 0.351         | 0.848     | 1.591     |
| 25                                                       | 0.976     | 0.880         | 0.711     | 1.340     |
| 26                                                       | 1.154     | 0.376         | 0.840     | 1.587     |
| 27                                                       | 1.126     | 0.464         | 0.819     | 1.548     |
| 28                                                       | 1.037     | 0.822         | 0.756     | 1.423     |
| 29                                                       | 1.181     | 0.341         | 0.839     | 1.662     |
| 30                                                       | 0.953     | 0.783         | 0.678     | 1.340     |
| 31                                                       | 0.963     | 0.838         | 0.673     | 1.378     |
| 32                                                       | 0.865     | 0.540         | 0.545     | 1.374     |
| 33                                                       | 0.817     | 0.395         | 0.513     | 1.302     |
| 34                                                       | 1.445     | 0.120         | 0.908     | 2.298     |
| <i>Precipitation (1 month lag)</i>                       | 0.988     | 0.044         | 0.977     | 1.000     |
| <i>Proportion of tests RDT</i>                           | 2.351     | 0.000         | 1.742     | 3.174     |
| <i>Count of patients not suspected of having malaria</i> | 1.000     | 0.860         | 1.000     | 1.000     |
| <i>Calendar month</i>                                    |           |               |           |           |
| January                                                  | REF       |               |           |           |
| February                                                 | 0.633     | 0.003         | 0.470     | 0.851     |
| March                                                    | 0.742     | 0.044         | 0.554     | 0.992     |
| April                                                    | 0.967     | 0.784         | 0.759     | 1.232     |
| May                                                      | 2.103     | 0.000         | 1.587     | 2.786     |
| June                                                     | 3.035     | 0.000         | 2.271     | 4.055     |
| July                                                     | 2.636     | 0.000         | 2.049     | 3.391     |
| August                                                   | 1.984     | 0.000         | 1.462     | 2.691     |
| September                                                | 2.026     | 0.000         | 1.515     | 2.709     |
| October                                                  | 2.224     | 0.000         | 1.689     | 2.929     |
| November                                                 | 1.848     | 0.000         | 1.388     | 2.460     |
| December                                                 | 1.198     | 0.216         | 0.900     | 1.594     |
| Constant                                                 | 300.471   | 0.000         | 195.082   | 462.794   |

Supplementary Fig 5. Adjust IRR (the measure of center for the error bars) and 95% confidence intervals (the error bars) for study objective 2 with raw laboratory-confirmed case counts as model outcome.

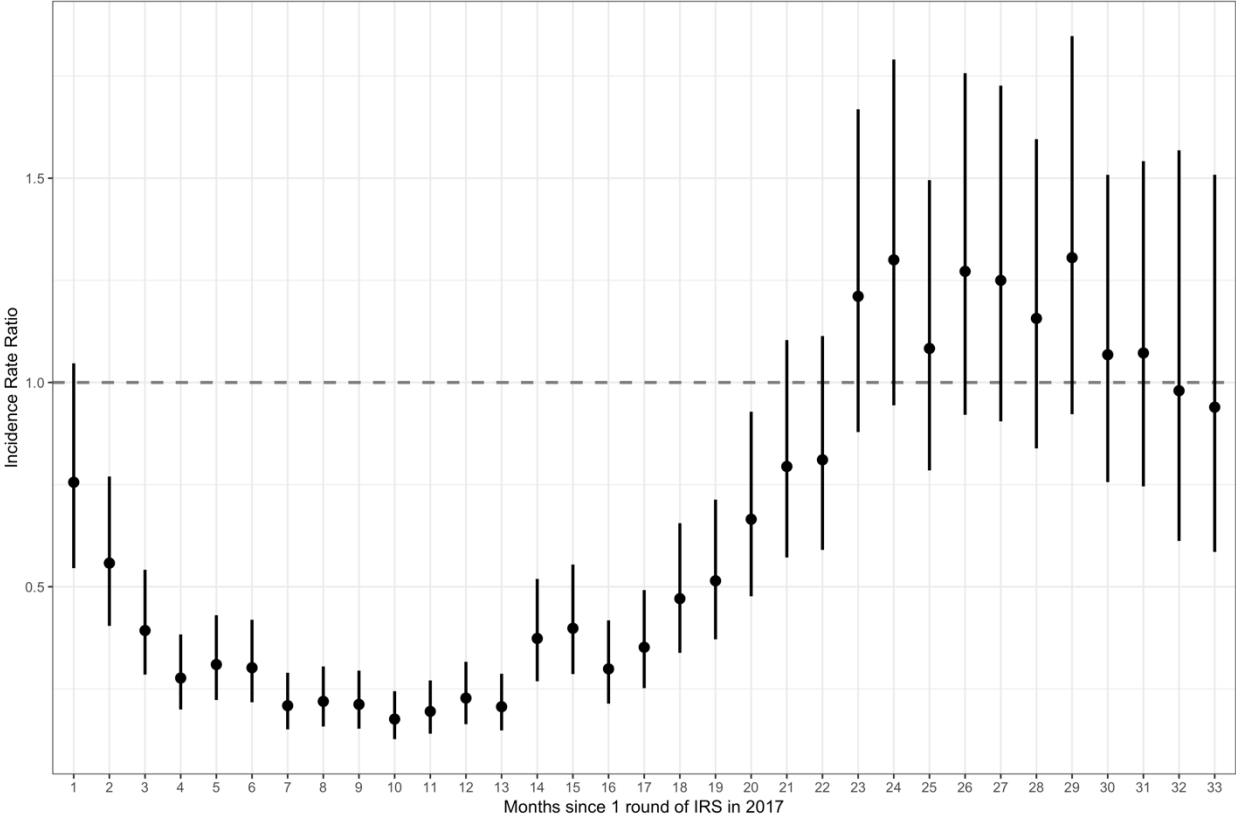

Supplementary Fig 6. Case counts over time for the five study sites included in the analysis for study objective 3.

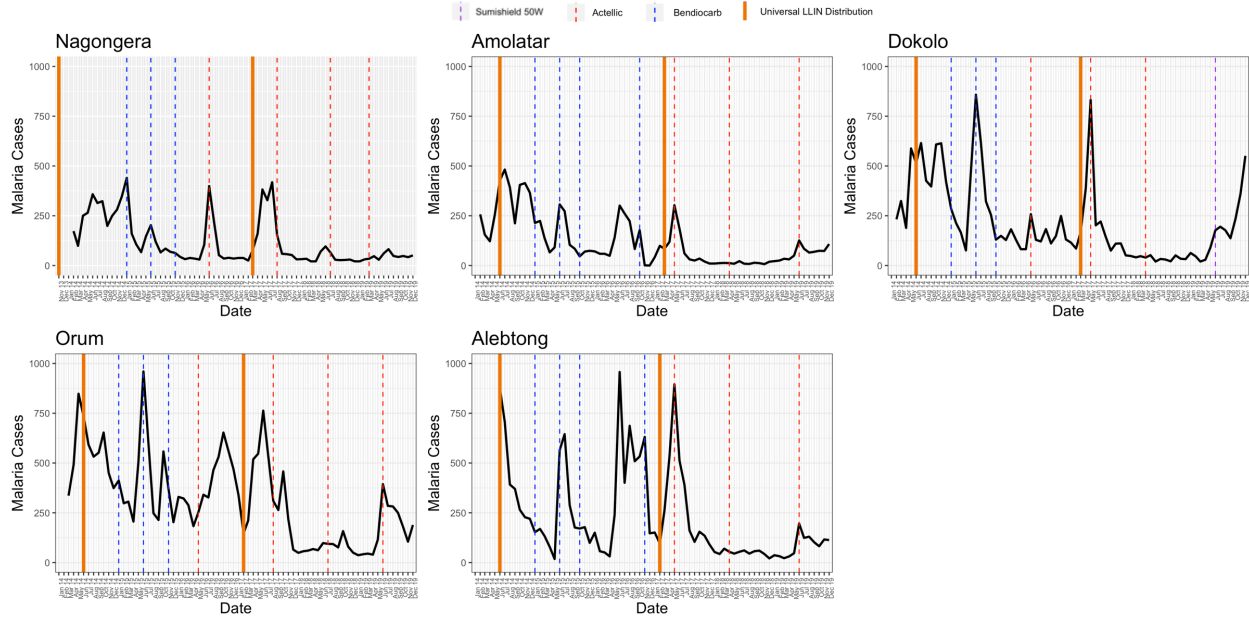



Supplementary Fig 7. Adjust IRR (the measure of center for the error bars) and 95% confidence intervals (the error bars) for study objective 3 with raw laboratory-confirmed case counts as model outcome.

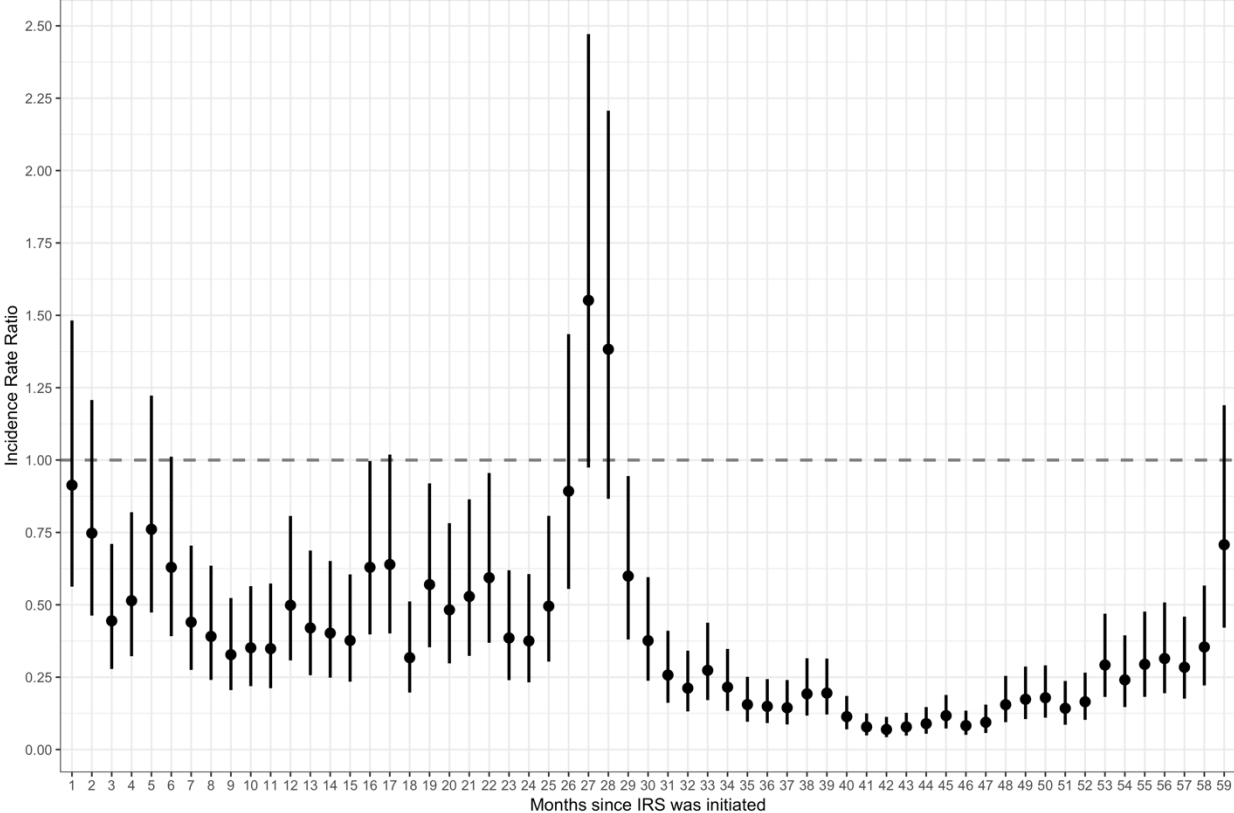

Supplementary Table 3. Coefficients and 95% confidence intervals for study objective 3. P-values are 2-sided and correspond to t-test from regression models. No adjustment for multiple comparisons was made.

| <i>Variable</i>                   | <b>OR</b> | <b>pvalue</b> | <b>LL</b> | <b>UL</b> |
|-----------------------------------|-----------|---------------|-----------|-----------|
| <i>Months since IRS initiated</i> |           |               |           |           |
| 0                                 | REF       |               |           |           |
| 1                                 | 0.751     | 0.231         | 0.470     | 1.200     |
| 2                                 | 0.645     | 0.065         | 0.405     | 1.027     |
| 3                                 | 0.394     | 0.000         | 0.250     | 0.622     |
| 4                                 | 0.488     | 0.002         | 0.310     | 0.769     |
| 5                                 | 0.780     | 0.290         | 0.492     | 1.236     |
| 6                                 | 0.551     | 0.011         | 0.348     | 0.874     |
| 7                                 | 0.381     | 0.000         | 0.241     | 0.603     |
| 8                                 | 0.347     | 0.000         | 0.216     | 0.556     |
| 9                                 | 0.295     | 0.000         | 0.187     | 0.466     |
| 10                                | 0.310     | 0.000         | 0.195     | 0.491     |
| 11                                | 0.289     | 0.000         | 0.178     | 0.468     |
| 12                                | 0.415     | 0.000         | 0.259     | 0.663     |
| 13                                | 0.335     | 0.000         | 0.208     | 0.540     |
| 14                                | 0.322     | 0.000         | 0.202     | 0.513     |
| 15                                | 0.310     | 0.000         | 0.196     | 0.491     |
| 16                                | 0.522     | 0.004         | 0.334     | 0.815     |
| 17                                | 0.521     | 0.005         | 0.332     | 0.819     |
| 18                                | 0.300     | 0.000         | 0.188     | 0.479     |
| 19                                | 0.527     | 0.007         | 0.330     | 0.841     |
| 20                                | 0.454     | 0.001         | 0.283     | 0.726     |
| 21                                | 0.532     | 0.010         | 0.329     | 0.860     |
| 22                                | 0.738     | 0.199         | 0.464     | 1.173     |
| 23                                | 0.380     | 0.000         | 0.240     | 0.602     |
| 24                                | 0.436     | 0.001         | 0.273     | 0.696     |
| 25                                | 0.467     | 0.002         | 0.290     | 0.751     |
| 26                                | 0.756     | 0.235         | 0.477     | 1.199     |
| 27                                | 1.196     | 0.437         | 0.762     | 1.878     |
| 28                                | 1.078     | 0.747         | 0.685     | 1.696     |
| 29                                | 0.500     | 0.002         | 0.321     | 0.778     |
| 30                                | 0.329     | 0.000         | 0.210     | 0.515     |
| 31                                | 0.227     | 0.000         | 0.144     | 0.357     |
| 32                                | 0.180     | 0.000         | 0.113     | 0.287     |
| 33                                | 0.227     | 0.000         | 0.143     | 0.359     |
| 34                                | 0.170     | 0.000         | 0.107     | 0.271     |
| 35                                | 0.127     | 0.000         | 0.080     | 0.203     |
| 36                                | 0.121     | 0.000         | 0.075     | 0.195     |
| 37                                | 0.108     | 0.000         | 0.066     | 0.178     |
| 38                                | 0.151     | 0.000         | 0.094     | 0.244     |
| 39                                | 0.154     | 0.000         | 0.097     | 0.244     |
| 40                                | 0.094     | 0.000         | 0.059     | 0.152     |
| 41                                | 0.065     | 0.000         | 0.041     | 0.102     |
| 42                                | 0.062     | 0.000         | 0.038     | 0.099     |
| 43                                | 0.069     | 0.000         | 0.043     | 0.111     |

|                                                          |         |       |         |         |
|----------------------------------------------------------|---------|-------|---------|---------|
| 44                                                       | 0.078   | 0.000 | 0.048   | 0.126   |
| 45                                                       | 0.096   | 0.000 | 0.060   | 0.152   |
| 46                                                       | 0.067   | 0.000 | 0.042   | 0.107   |
| 47                                                       | 0.074   | 0.000 | 0.045   | 0.120   |
| 48                                                       | 0.125   | 0.000 | 0.077   | 0.204   |
| 49                                                       | 0.129   | 0.000 | 0.079   | 0.211   |
| 50                                                       | 0.138   | 0.000 | 0.086   | 0.222   |
| 51                                                       | 0.113   | 0.000 | 0.069   | 0.185   |
| 52                                                       | 0.130   | 0.000 | 0.082   | 0.206   |
| 53                                                       | 0.229   | 0.000 | 0.145   | 0.362   |
| 54                                                       | 0.209   | 0.000 | 0.129   | 0.339   |
| 55                                                       | 0.255   | 0.000 | 0.159   | 0.408   |
| 56                                                       | 0.259   | 0.000 | 0.162   | 0.413   |
| 57                                                       | 0.232   | 0.000 | 0.145   | 0.370   |
| 58                                                       | 0.269   | 0.000 | 0.170   | 0.425   |
| 59                                                       | 0.565   | 0.026 | 0.342   | 0.935   |
| <i>Precipitation (1 month lag)</i>                       | 1.000   | 0.995 | 0.990   | 1.010   |
| <i>Proportion of tests RDT</i>                           | 0.743   | 0.027 | 0.572   | 0.967   |
| <i>Count of patients not suspected of having malaria</i> | 1.000   | 0.018 | 1.000   | 1.000   |
| <i>Calendar month</i>                                    |         |       |         |         |
| <i>January</i>                                           | REF     |       |         |         |
| <i>February</i>                                          | 0.865   | 0.415 | 0.610   | 1.226   |
| <i>March</i>                                             | 0.801   | 0.257 | 0.547   | 1.175   |
| <i>April</i>                                             | 0.780   | 0.209 | 0.529   | 1.150   |
| <i>May</i>                                               | 1.517   | 0.035 | 1.031   | 2.233   |
| <i>June</i>                                              | 2.357   | 0.000 | 1.599   | 3.476   |
| <i>July</i>                                              | 2.248   | 0.000 | 1.504   | 3.360   |
| <i>August</i>                                            | 1.505   | 0.064 | 0.977   | 2.319   |
| <i>September</i>                                         | 1.281   | 0.235 | 0.851   | 1.927   |
| <i>October</i>                                           | 1.613   | 0.018 | 1.087   | 2.394   |
| <i>November</i>                                          | 1.528   | 0.030 | 1.042   | 2.239   |
| <i>December</i>                                          | 1.103   | 0.581 | 0.779   | 1.563   |
| <i>Constant</i>                                          | 536.361 | 0.000 | 308.828 | 931.531 |

Supplementary Table 4. Details of indoor residual spraying campaigns for 5 districts that initiated IRS in 2013-14.

| MRC                                                             | District |                    | 1 <sup>st</sup> round  | 2 <sup>nd</sup> round  | 3 <sup>rd</sup> round  | 4 <sup>th</sup> round  | 5 <sup>th</sup> round   | 6 <sup>th</sup> round | 7 <sup>th</sup> round   |
|-----------------------------------------------------------------|----------|--------------------|------------------------|------------------------|------------------------|------------------------|-------------------------|-----------------------|-------------------------|
| Nagongera HCIV                                                  | Tororo   | <i>Insecticide</i> | Bendiocarb             | Bendiocarb             | Bendiocarb             | Actellic               | Actellic                | Actellic              | Actellic                |
|                                                                 |          | <i>Date</i>        | 08-Dec-14 to 19-Feb-15 | 08-Jun-15 to 12-Jul-15 | 02-Nov-15 to 12-Dec-15 | 12-Jun-16 to 9-Jul-16  | 17-July-17 to 19-Aug-17 | 11-Jun-18 to 27-7-18  | 18-Mar-19 to 15-Apr-19  |
|                                                                 |          | <i>Coverage</i>    | N/A                    | 94.6%                  | 96.3%                  | 93%                    | 94.9%                   | 95.8%                 | 92.1%                   |
| Amolatar HCIV                                                   | Amolatar | <i>Insecticide</i> | Bendiocarb             | Bendiocarb             | Bendiocarb             | Bendiocarb             | Actellic                | Actellic              | Actellic                |
|                                                                 |          | <i>Date</i>        | 08-Dec-14 to 19-Feb-15 | 08-Jun-15 to 12-Jul-15 | 12-Oct-15 to 07-Nov-15 | 24-Oct-16 to 19-Nov-16 | 2-May-17 to 6-June-17   | 9-Apr-18 to 12-May-18 | 27-May-19 to 27-June-19 |
|                                                                 |          | <i>Coverage</i>    | N/A                    | 96.1%                  | 91.4%                  | 94.1%                  | 95.8%                   | 96.1%                 | 94.2%                   |
| Dokolo HCIV                                                     | Dokolo   | <i>Insecticide</i> | Bendiocarb             | Bendiocarb             | Bendiocarb             | Actellic               | Actellic                | Actellic              | Sumishield 50W          |
|                                                                 |          | <i>Date</i>        | 08-Dec-14 to 19-Feb-15 | 08-Jun-15 to 12-Jul-15 | 12-Oct-15 to 07-Nov-15 | 18-Apr-16 to 9-Jul-16  | 2-May-17 to 6-June-17   | 9-Apr-18 to 12-May-18 | 27-May-19 to 27-June-19 |
|                                                                 |          | <i>Coverage</i>    | N/A                    | 88.7%                  | 92.1%                  | 94.8%                  | 97.6%                   | 94.3%                 | 95.2%                   |
| Orum HCIV                                                       | Otuke    | <i>Insecticide</i> | Bendiocarb             | Bendiocarb             | Bendiocarb             | Actellic               | Actellic                | Actellic              | Actellic                |
|                                                                 |          | <i>Date</i>        | 08-Dec-14 to 19-Feb-15 | 08-Jun-15 to 12-Jul-15 | 12-Oct-15 to 07-Nov-15 | 18-Apr-16 to 9-Jul-16  | 17-July-17 to 19-Aug-17 | 11-Jun-18 to 27-7-18  | 27-May-19 to 27-June-19 |
|                                                                 |          | <i>Coverage</i>    | N/A                    | 96.6%                  | 94.8%                  | 97.6%                  | 96.7%                   | 98.4%                 | 98.8%                   |
| Alebtong HCIV                                                   | Alebtong | <i>Insecticide</i> | Bendiocarb             | Bendiocarb             | Bendiocarb             | Bendiocarb             | Actellic                | Actellic              | Actellic                |
|                                                                 |          | <i>Date</i>        | 08-Dec-14 to 19-Feb-15 | 08-Jun-15 to 12-Jul-15 | 12-Oct-15 to 07-Nov-15 | 24-Oct-16 to 19-Nov-16 | 2-May-17 to 6-June-17   | 9-Apr-18 to 12-May-18 | 27-May-19 to 27-June-19 |
|                                                                 |          | <i>Coverage</i>    | N/A                    | 96.9%                  | 95.4%                  | 97.5%                  | 98.3%                   | 90.9%                 | 95.0%                   |
| Coverage data not available for the first IRS campaign in 2014. |          |                    |                        |                        |                        |                        |                         |                       |                         |
